# Supplementary material
Source: PubMed Central journal article supplement (PMC4875854)
Supplement: NIHMS776809-supplement-1.pdf [file NIHMS776809-supplement-1.pdf]

**Supplementary Figure 1. EZH2 has a minimal effect on RANKL-induced NF- $\kappa$ B signaling but regulates RANKL-induced Fos expression.**

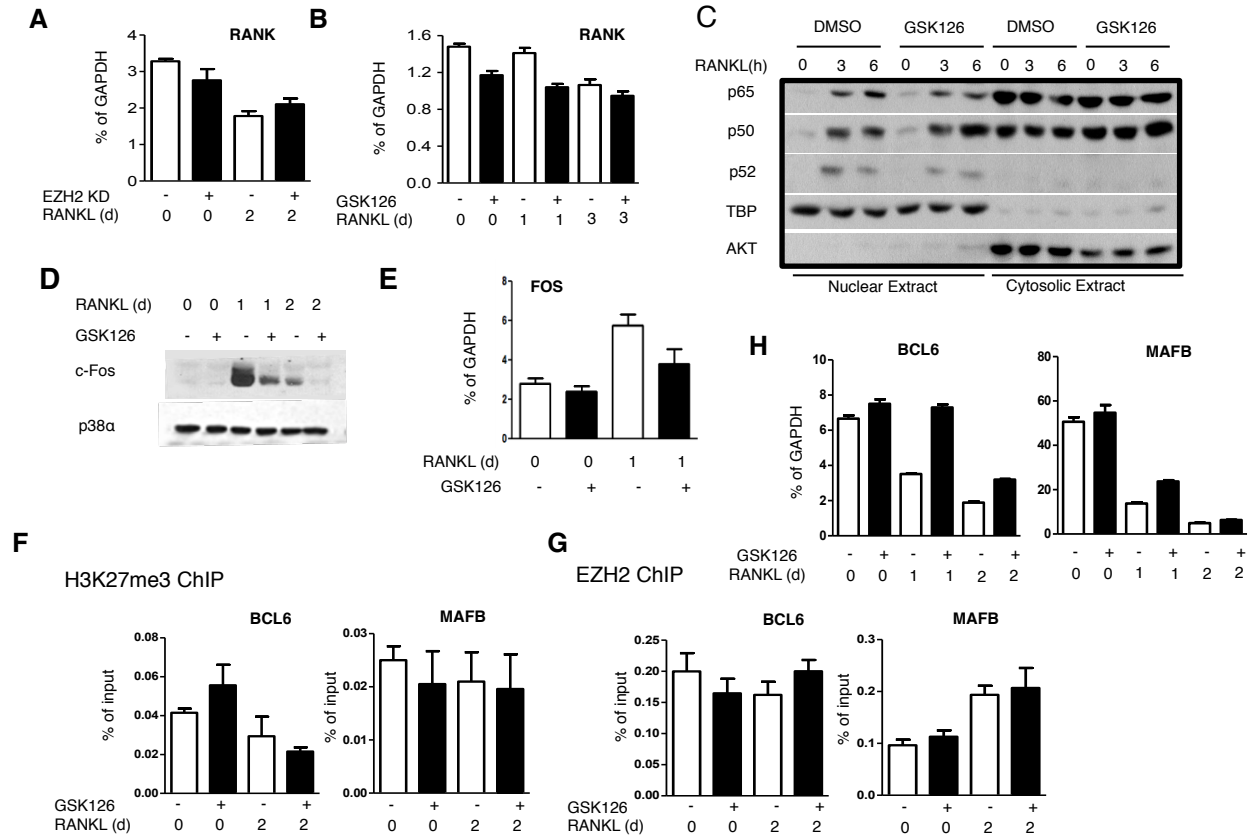

- A. RANK expression in EZH2 knockdown and control cells with or without RANKL stimulation. Data are shown as mean  $\pm$  SEM of triplicates from one experiment and are representative of 4 experiments.
- B. RANK expression in monocytes pre-treated with GSK126 or DMSO for 1 day and stimulated with RANKL for 0, 1 or 3 days. Data are shown as mean  $\pm$  SEM of triplicates from one experiment and are representative of 3 experiments.
- C. OCPs were treated with or without GSK126 for one day and then stimulated with RANKL for the indicated times. Nuclear lysates were blotted with anti-p65, p50, p52, TBP and AKT antibodies. TBP was used as a loading control for nuclear lysates.
- D. Immunoblot of c-Fos expression in cells treated with GSK126. p38 $\alpha$  is shown as a loading control. Blots shown are representative of 3 independent experiments.
- E. RT-PCR analysis of mRNA from GSK126 treated cells. mRNA levels were normalized relative to the expression of GAPDH and results are shown as mean  $\pm$  SEM from two independent experiments. The kinetics of Fos mRNA induction varied among donors and the suppression of Fos mRNA was not consistently observed at different time points.
- F. ChIP assays for H3K27me3 at the BCL6 or MAFB promoter in cells pretreated with GSK126 or DMSO and stimulated with RANKL. Data are shown as mean  $\pm$  SEM of triplicates from one representative experiment out of 4.
- G. ChIP assays for EZH2 at the BCL6 or MAFB promoter in cells pretreated with GSK126 or DMSO and stimulated with RANKL. Data shown as mean  $\pm$  SEM of triplicates from one representative experiment out of 4.
- H. RT-PCR analysis of mRNA from GSK126 treated cells. PCR data is shown as mean  $\pm$  SEM of triplicates;  $p < 0.05$  for percent suppression in pooled data where  $N = 4$  (one-tailed t-test).

**Supplementary Figure 2.** GSK-126 did not significantly suppress bone formation in the post-ovariectomy model. The dose-dependent effect of GSK-126 on osteoblast cultures.

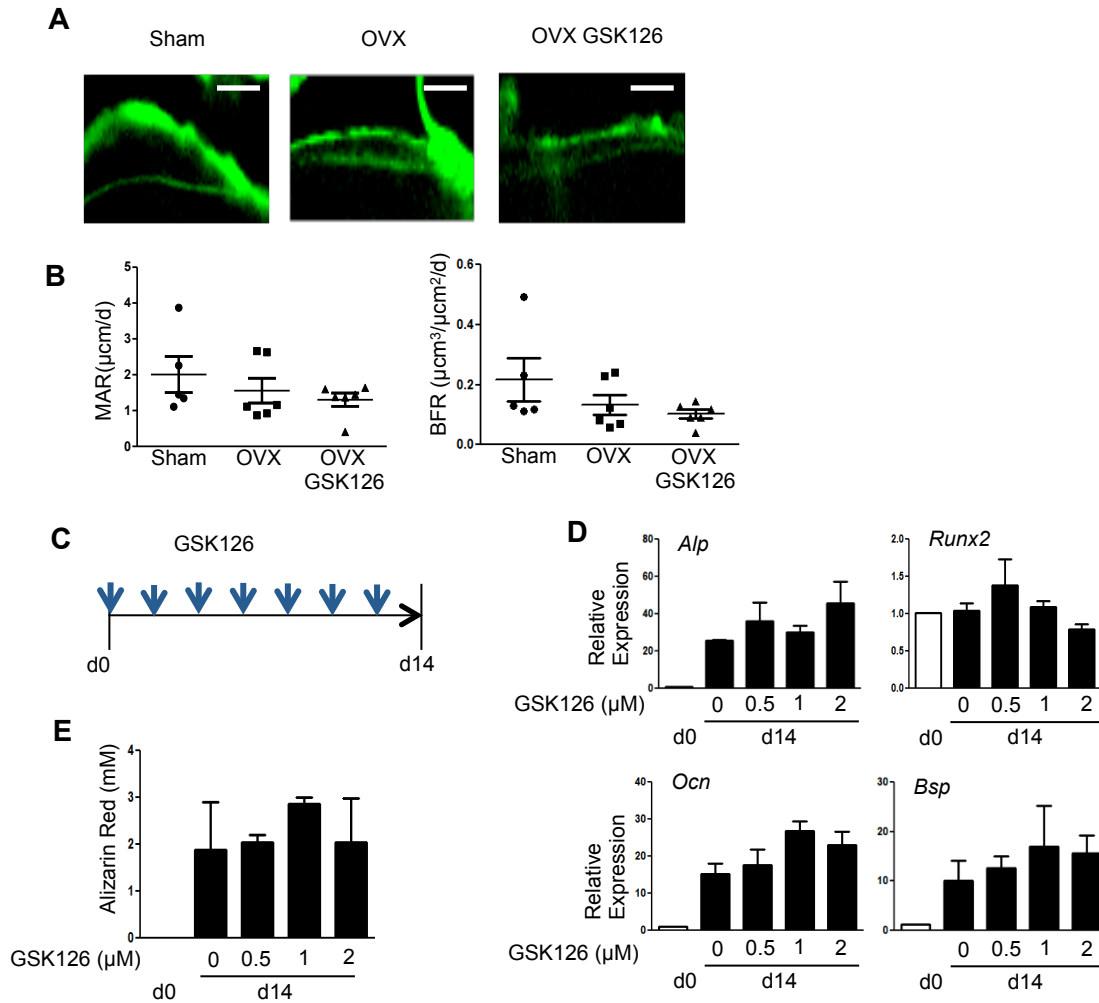

A. Representative images showing casein double labeling in trabecular bone. Scale bars 10  $\mu\text{m}$ .

B. Bone formation parameters including mineral apposition rate (MAR) and bone formation rate (BFR) were measured in sham, OVX and GSK-126 treated OVX group ( $n>5$ ). All data are shown as mean  $\pm$  SEM and the statistical analysis (One-way ANOVA) showed no significant differences among groups.

C-E. Primary osteoblasts were isolated from calvariae and cultured with  $\alpha$ -MEM containing 10% FBS, 50  $\mu\text{g}/\text{ml}$  of ascorbic acid, and 8 mM beta-glycerophosphate.

C. Experimental scheme. Cells were treated with either DMSO or GSK-126 at the indicated doses every other day from the beginning of the culture.

D. mRNA was measured using real-time PCR at day 14. mRNA levels were normalized relative to the expression of GAPDH and results are shown as mean  $\pm$  SEM from two independent experiments.

E. Alizarin Red Staining of mineralizing osteoblast cells.
